# Supplementary material for: A Review of MAL-PDT for the Treatment Strategy of Actinic Keratosis: Broader Clinical Perspectives Beyond the Data and Guideline Recommendations
Source: Springer Nature journal article supplement (doi:10.1007/s13555-023-00936-w), 2023-06-10
Supplement: MOESM1 [file 25472400]

## Supplementary material

**Article type** | Narrative review

**Title** | A review of MAL-PDT for the treatment strategy of actinic keratosis: Broader clinical perspectives beyond the data and guideline recommendations

Szeimies R-M,<sup>1</sup> Dirschka T,<sup>2</sup> Fagnoli MC,<sup>3,4</sup> Gilaberte Y,<sup>5</sup> Hædersdal M<sup>6</sup>, Chavda R,<sup>7</sup> Calzavara-Pinton P<sup>8\*</sup>

<sup>1</sup>Department of Dermatology and Allergology, Klinikum Vest GmbH Academic Teaching Hospital, Recklinghausen, Germany; <sup>2</sup>CentroDerm Clinic, Wuppertal, Germany; <sup>3</sup>Department of Biotechnological and Applied Clinical Sciences, University of L'Aquila, L'Aquila, Italy; <sup>4</sup>Dermatology Unit, San Salvatore Hospital, L'Aquila, Italy; <sup>5</sup>Department of Dermatology, Miguel Servet University Hospital, IIS Aragón, Zaragoza, Spain; <sup>6</sup>Department of Dermatology, Bispebjerg and Frederiksberg Hospitals, Copenhagen University Hospital, Copenhagen, Denmark; <sup>7</sup>Galderma SA, Switzerland; <sup>8</sup>Dermatology Department, University of Brescia, Brescia, Italy

\*Corresponding author: Piergiacomo Calzavara-Pinton

Email address: piergiacomo.calzavarapinton@unibs.it

Correspondence address: Piazza Spedali Civili 1, 25123 Brescia

**Table S1. PubMed search strings utilized to search MEDLINE.**

| Search date     | Search string                                                                                                            | Total number of results | Number of results after exclusions* |
|-----------------|--------------------------------------------------------------------------------------------------------------------------|-------------------------|-------------------------------------|
| 24 October 2022 | ((methyl aminolevulinate[Title] OR (MAL[Title])) AND ((actinic keratos*[Title] OR (AK[Title] OR (solar keratos*[Title])) | 37                      | 37                                  |
| 24 October 2022 | ((methyl aminolevulinate[Title] OR (MAL[Title])) AND (long term efficacy)                                                | 14                      | 13                                  |
| 24 October 2022 | ((methyl aminolevulinate[Title] OR (MAL[Title])) AND (efficacy) AND (chronic)                                            | 6                       | 4                                   |
| 24 October 2022 | ((methyl aminolevulinate[Title] OR (MAL[Title])) AND (field cancerization)                                               | 17                      | 16                                  |
| 24 October 2022 | ((methyl aminolevulinate[Title] OR (MAL[Title])) AND (5-fluorouracil)                                                    | 5                       | 5                                   |
| 24 October 2022 | ((methyl aminolevulinate[Title] OR (MAL[Title])) AND ((photodynamic therapy) OR (PDT))                                   | 147                     | 141                                 |
| 24 October 2022 | ((methyl aminolevulinate[Title/Abstract] OR (MAL[Title/Abstract])) AND (off label)                                       | 10                      | 5                                   |
| 24 October 2022 | ((methyl aminolevulinate[Title] OR (MAL[Title])) AND (patient[Title/Abstract])                                           | 95                      | 90                                  |
| 24 October 2022 | (delay* onset[Title/Abstract] AND (actinic keratosis)                                                                    | 2                       | 2                                   |
| 24 October 2022 | (delay* onset[Title/Abstract] AND ((photodynamic therapy) OR (PDT))                                                      | 16                      | 16                                  |
| 25 October 2022 | (actinic keratos*[Title] AND ((guideline*[Title] OR (consensus[Title]))                                                  | 39                      | 36                                  |
| 25 October 2022 | (actinic keratos*[Title] AND ((photodynamic therapy[Title] OR (PDT[Title]))                                              | 294                     | 274                                 |

\*exclusion terms were “NOT acne vulgaris” and “NOT United States”.

**Table S2. Selected PubMed filters utilized to search MEDLINE.**

| Article type                     | Age                           | Sex    | Species |
|----------------------------------|-------------------------------|--------|---------|
| Clinical study                   | Adults: 19+ years             | Female | Humans  |
| Clinical trial                   | Young adult: 19–24 years      | Male   |         |
| Congress                         | Adult: 19–44 years            |        |         |
| Consensus development conference | Middle aged + aged: 45+ years |        |         |
| Guideline                        | Middle aged: 45–64 years      |        |         |
| Journal article                  | Aged: 65+ years               |        |         |
| Meta-analysis                    | 80 and over: 80+ years        |        |         |
| Multicenter study                |                               |        |         |
| Practice guideline               |                               |        |         |
| Randomized controlled trial      |                               |        |         |
| Review                           |                               |        |         |
| Systematic review                |                               |        |         |

English language publications between January 01, 2010 and October 25, 2022 with all the above filters were searched.
